# Supplementary material for: Gene-environment interactions and predictors of breast cancer in family-based multi-ethnic groups
Source: PubMed Central journal article supplement (PMC6044380; doi:10.18632/oncotarget.25520), 2018-06-26
Supplement: oncotarget-09-29019-s001.pdf [file oncotarget-09-29019-s001.pdf]

## Gene-environment interactions and predictors of breast cancer in family-based multi-ethnic groups

### SUPPLEMENTARY MATERIALS

Supplementary Table 1: Comparisons on demographic and lifestyle factors across race-ethnic groups

|                      | Asian (n=32)<br>n (%)    | White (n=22)<br>n (%)    | Hispanic (n= 20)<br>n (%) | Black (n= 6)<br>n (%)   | <i>p</i> |
|----------------------|--------------------------|--------------------------|---------------------------|-------------------------|----------|
| Age                  |                          |                          |                           |                         |          |
| Years <i>M±SD</i>    | 54.34 ± 14.63<br>(20-70) | 52.86 ± 14.63<br>(26-70) | 47.95 ± 17.31<br>(18-69)  | 61.33 ± 9.83<br>(49-69) | 0.1526   |
| BMI Status           |                          |                          |                           |                         |          |
| WNL                  | 25 (78.12)               | 6 (27.27)                | 10 (50)                   | 0 (0)                   | <0.0001  |
| Overweight and Obese | 7 (21.88)                | 16 (72.73)               | 10 (50)                   | 6 (100)                 |          |
| Alcohol Drinker      |                          |                          |                           |                         |          |
| No                   | 26 (81.25)               | 2 (9.09)                 | 8 (40)                    | 5 (83.33)               | <0.0001  |
| Yes                  | 6 (18.75)                | 20 (90.91)               | 12 (60)                   | 1 (16.67)               |          |
| Smoking              |                          |                          |                           |                         |          |
| No                   | 32 (100)                 | 20 (90.91)               | 20 (100)                  | 6 (100)                 | 0.1443   |
| Yes                  | 0 (0)                    | 2 (9.09)                 | 0 (0)                     | 0 (0)                   |          |

Note: WNL: within normal limit (18.5-24.9).

**Supplementary Table 2: Comparisons on gene polymorphisms across racial-ethnic groups**

|                         | Asian (n=32)<br>n (%)     | White (n=22)<br>n (%)     | Hispanic (n=20)<br>n (%) | Black (n=6)<br>n (%)     | <i>p</i> |
|-------------------------|---------------------------|---------------------------|--------------------------|--------------------------|----------|
| <i>MTHFR 677</i>        |                           |                           |                          |                          |          |
| 0 (CC)                  | 27 (84.38)                | 12 (54.55)                | 5 (25)                   | 5 (83.33)                | 0.0002   |
| 1 (CT)                  | 5 (15.62)                 | 6 (27.27)                 | 9 (45)                   | 0 (0%)                   |          |
| 2 (TT)                  | 0 (0)                     | 4 (18.18)                 | 6 (30)                   | 1 (16.67)                |          |
| <i>MTHFR 1298</i>       |                           |                           |                          |                          |          |
| 0 (AA)                  | 13 (40.63)                | 12 (54.55)                | 16 (80)                  | 4 (66.67)                | 0.0450   |
| 1 (AC)                  | 15 (46.87)                | 9 (40.91)                 | 4 (20)                   | 2 (33.33)                |          |
| 2 (CC)                  | 4 (12.5)                  | 1 (4.54)                  | 0 (0)                    | 0 (0)                    |          |
| <i>MTHFR deficiency</i> |                           |                           |                          |                          |          |
| 0%                      | 10 (31.25)                | 7 (31.82)                 | 2 (10)                   | 3 (50)                   | 0.0015   |
| 15%                     | 13 (40.63)                | 4 (18.18)                 | 3 (15)                   | 2 (33.33)                |          |
| 30%                     | 4 (12.5)                  | 1 (4.55)                  | 0 (0)                    | 0 (0)                    |          |
| 35%                     | 3 (9.38)                  | 1 (4.55)                  | 8 (40)                   | 0 (0)                    |          |
| 50%                     | 2 (6.25)                  | 5 (22.73)                 | 1 (5)                    | 0 (0)                    |          |
| 70%                     | 0 (0)                     | 4 (18.18)                 | 6 (30)                   | 1 (16.67)                |          |
| <i>M±SD</i>             | 16.25 ± 14.76<br>(0 - 70) | 29.77 ± 27.27<br>(0 - 70) | 39.75 ± 23.81<br>(0- 70) | 16.67 ± 27.14<br>(0- 70) |          |
| ≥ 50%                   | 2 (6.25)                  | 9 (40.91)                 | 7 (35)                   | 0 (0)                    |          |
| <i>MTR 2756</i>         |                           |                           |                          |                          |          |
| 0 (AA)                  | 24 (75)                   | 13 (59.09)                | 17 (85)                  | 2 (33.33)                | 0.0548   |
| 1 (AG)                  | 6 (18.75)                 | 7 (31.82)                 | 3 (15)                   | 4 (66.67)                |          |
| 2 (GG)                  | 2 (6.25)                  | 2 (9.09)                  | 0 (0)                    | 0 (0)                    |          |
| <i>MTRR 66</i>          |                           |                           |                          |                          |          |
| 0 (AA)                  | 16 (50)                   | 5 (22.73)                 | 10 (45.45)               | 3 (50)                   | 0.1828   |
| 1 (AG)                  | 16 (50)                   | 11 (50)                   | 6 (30)                   | 3 (50)                   |          |
| 2 (GG)                  | 0 (0)                     | 6 (27.27)                 | 4 (20)                   | 0 (0)                    |          |
| <i>DHFR 19bp</i>        |                           |                           |                          |                          |          |
| 0 (Ins/Ins)             | 7 (21.88)                 | 7(31.82)                  | 3 (15)                   | 1 (16.67)                | 0.6009   |
| 1 (Ins/Del)             | 19 (59.37)                | 11 (50.0)                 | 12 (60)                  | 3 (50)                   |          |
| 2 (Del/Del)             | 6 (18.75)                 | 4 (18.18)                 | 5 (25)                   | 2 (33.33)                |          |
| Total mutations         |                           |                           |                          |                          |          |
| (0-10)                  | 9 (28.12)                 | 11 (50)                   | 9 (45)                   | 2 (33.33)                | 0.3767   |
| ≥ 3                     | 2.65 ± 1.26<br>(1-5)      | 3.5 ± 1.62<br>(1 - 7)     | 3.2 ± 1.32<br>(1 - 5)    | 3.0 ± 1.67<br>(1 - 4)    |          |

**Supplementary Table 3A: Comparisons on dietary factor between control and breast cancer groups**

|                      | <b>Controls (N = 40)</b><br><b>n (%)</b> | <b>Cases (N = 40)</b><br><b>n (%)</b> | <b><i>p</i></b> |
|----------------------|------------------------------------------|---------------------------------------|-----------------|
| <b>Carbohydrates</b> |                                          |                                       |                 |
| Under                | 6 (15)                                   | 7 (17.5)                              | 0.5790          |
| WNL (45-65%)         | 31 (77.5)                                | 32 (80)                               |                 |
| Over                 | 3 (7.5)                                  | 1 (2.5)                               |                 |
| <b>Protein</b>       |                                          |                                       |                 |
| Under                | 0 (0)                                    | 0 (0)                                 | -               |
| WNL (10-35%)         | 40 (100)                                 | 40 (100)                              |                 |
| Over                 | 0 (0)                                    | 0 (0)                                 |                 |
| <b>Total Fat</b>     |                                          |                                       |                 |
| Under                | 2 (5)                                    | 0 (0)                                 | 0.3312          |
| WNL (20-35%)         | 25 (62.5)                                | 28 (70)                               |                 |
| Over                 | 13 (32.5)                                | 12 (30)                               |                 |
| <b>Saturated Fat</b> |                                          |                                       |                 |
| ≤10%                 | 22 (55)                                  | 30 (75)                               | 0.0608          |
| >10%                 | 18 (45)                                  | 10 (25)                               |                 |
| <b>Cholesterol</b>   |                                          |                                       |                 |
| <300 mg              | 28 (70)                                  | 29 (72.5)                             | 0.8049          |
| >300 mg              | 12 (30)                                  | 11 (27.5)                             |                 |
| <b>Sodium</b>        |                                          |                                       |                 |
| <2300 mg             | 15 (37.5)                                | 16 (40)                               | 0.8185          |
| ≥2300 mg             | 25 (62.5)                                | 24 (60)                               |                 |
| <b>Fiber</b>         |                                          |                                       |                 |
| Under 25 gm          | 26 (65)                                  | 28 (70)                               | 0.6331          |
| ≥25 gm               | 14 (35)                                  | 12 (30)                               |                 |
| <b>Folate</b>        |                                          |                                       |                 |
| <75%                 | 17 (42.5)                                | 18 (45)                               | 0.9710          |
| 75-150%              | 17 (42.5)                                | 16 (40)                               |                 |
| >150%                | 6 (15)                                   | 6 (15)                                |                 |

Note: WNL: within normal limit.

**Supplementary Table 3B: Comparisons on dietary factor across race-ethnic groups**

|                      | Asian (n=32)<br>n (%) | White (n=22)<br>n (%) | Hispanic (n= 20)<br>n (%) | Black (n= 6)<br>n (%) | <i>p</i> |
|----------------------|-----------------------|-----------------------|---------------------------|-----------------------|----------|
| <b>Carbohydrates</b> |                       |                       |                           |                       |          |
| Under                | 5 (15.62)             | 7 (31.82)             | 1 (5)                     | 0 (0)                 | 0.1219   |
| WNL (45-65%)         | 24 (75)               | 14 (63.64)            | 19 (95)                   | 6 (100)               |          |
| Over                 | 3 (9.38)              | 1 (4.54)              | 0 (0)                     | 0 (0)                 |          |
| <b>Protein</b>       |                       |                       |                           |                       |          |
| Under                | 0 (0)                 | 0 (0)                 | 0 (0)                     | 0 (0)                 | -        |
| WNL (10-35%)         | 32 (100)              | 22 (100)              | 20 (100)                  | 6 (100)               |          |
| Over                 | 0 (0)                 | 0 (0)                 | 0 (0)                     | 0 (0)                 |          |
| <b>Total Fat</b>     |                       |                       |                           |                       |          |
| Under                | 2 (6.25)              | 0 (0)                 | 0 (0)                     | 0 (0)                 | 0.1606   |
| WNL (20-35%)         | 24 (75)               | 13 (59.09)            | 14 (70)                   | 2 (33.33)             |          |
| Over                 | 6 (18.75)             | 9 (40.91)             | 6 (30)                    | 4 (66.67)             |          |
| <b>Saturated Fat</b> |                       |                       |                           |                       |          |
| ≤10%                 | 25 (78.13)            | 13 (59.09)            | 11 (55)                   | 3 (50)                | 0.2374   |
| >10%                 | 7 (21.87)             | 9 (40.91)             | 9 (45)                    | 3 (50)                |          |
| <b>Cholesterol</b>   |                       |                       |                           |                       |          |
| <300 mg              | 25 (78.13)            | 15 (68.18)            | 13 (65)                   | 4 (66.67)             | 0.7333   |
| >300 mg              | 7 (21.87)             | 7 (31.82)             | 7 (35)                    | 2 (33.33)             |          |
| <b>Sodium</b>        |                       |                       |                           |                       |          |
| <2300 mg             | 16 (50)               | 6 (27.27)             | 9 (45)                    | 0 (0)                 | 0.0702   |
| ≥2300 mg             | 16 (50)               | 16 (72.73)            | 11 (55)                   | 6 (100)               |          |
| <b>Fiber</b>         |                       |                       |                           |                       |          |
| Under 25 gm          | 23 (71.87)            | 14 (63.64)            | 12 (60)                   | 5 (83.33)             | 0.6532   |
| ≥25 gm               | 9 (28.13)             | 8 (36.36)             | 8 (40)                    | 1 (16.67)             |          |
| <b>Folate</b>        |                       |                       |                           |                       |          |
| <75%                 | 19 (59.38)            | 6 (27.27)             | 9 (45)                    | 1 (16.67)             | 0.0736   |
| 75-150%              | 7 (21.87)             | 14 (63.64)            | 8 (40)                    | 4 (66.66)             |          |
| >150%                | 6 (18.75)             | 2 (9.09)              | 3 (15)                    | 1 (16.67)             |          |

Note: WNL: within normal limit.

**Supplementary Table 4A: Genetic predictors of breast cancer**

| Term              | Number of Splits | $G^2$      | Portion |
|-------------------|------------------|------------|---------|
| <i>MTR 2756</i>   | 47               | 0.46683922 | 0.2289  |
| <i>MTRR 66</i>    | 39               | 0.40775908 | 0.1999  |
| <i>MTHFR 1298</i> | 44               | 0.40619082 | 0.1992  |
| <i>MTHFR 677</i>  | 42               | 0.39631979 | 0.1943  |
| <i>DHFR 19</i>    | 48               | 0.36228456 | 0.1776  |

**Supplementary Table 4B: Major dietary nutrients as predictors of breast cancer**

| Term          | Number of Splits | $G^2$      | Portion |
|---------------|------------------|------------|---------|
| Saturated Fat | 39               | 0.87184388 | 0.3561  |
| Fiber         | 41               | 0.43670542 | 0.1784  |
| Carbohydrates | 33               | 0.35213736 | 0.1438  |
| Total Fat     | 32               | 0.35093705 | 0.1434  |
| Sodium        | 26               | 0.2311861  | 0.0944  |

**Supplementary Table 4C: Selected predictors of breast cancer for Asians (n=32)**

| Term                    | Number of Splits | $G^2$      | Portion |
|-------------------------|------------------|------------|---------|
| Age                     | 42               | 2.51023453 | 0.4591  |
| <i>MTHFR</i> deficiency | 27               | 1.21379071 | 0.2220  |
| BMI Status              | 23               | 0.48299861 | 0.0883  |
| Alcohol drinker         | 15               | 0.40221199 | 0.0736  |
| Saturated Fat           | 16               | 0.29803466 | 0.0545  |
| <i>MTRR 66</i>          | 23               | 0.21448573 | 0.0392  |
| <i>MTR 2756</i>         | 16               | 0.21396055 | 0.0391  |
| <i>DHFR 19bp</i>        | 13               | 0.13221365 | 0.0242  |

**Supplementary Table 4D: Selected predictors of breast cancer for Whites (n= 22)**

| Term                    | Number of Splits | $G^2$      | Portion |
|-------------------------|------------------|------------|---------|
| Age                     | 43               | 3.68629033 | 0.7524  |
| <i>MTHFR</i> deficiency | 22               | 0.4353972  | 0.0889  |
| Saturated Fat           | 23               | 0.28660573 | 0.0585  |
| <i>DHFR 19bp</i>        | 16               | 0.17859762 | 0.0365  |
| <i>MTR 2756</i>         | 20               | 0.15234298 | 0.0311  |
| <i>MTRR 66</i>          | 13               | 0.09013736 | 0.0184  |
| BMI Status              | 10               | 0.04184928 | 0.0085  |
| Alcohol drinker         | 1                | 0.02792895 | 0.0057  |

**Supplementary Table 4E: Selected predictors of breast cancer for Hispanics (n=20)**

| Term                    | Number of Splits | $G^2$      | Portion |
|-------------------------|------------------|------------|---------|
| Age                     | 35               | 2.82648098 | 0.6238  |
| <i>MTRR 66</i>          | 22               | 0.59102608 | 0.1304  |
| Saturated Fat           | 18               | 0.42277662 | 0.0933  |
| <i>MTHFR</i> deficiency | 15               | 0.33429059 | 0.0738  |
| BMI Status              | 13               | 0.13575253 | 0.0300  |
| <i>MTR 2756</i>         | 3                | 0.12093353 | 0.0267  |
| Alcohol drinker         | 12               | 0.09622098 | 0.0212  |
| <i>DHFR 19bp</i>        | 2                | 0.00379044 | 0.0008  |

**Supplementary Table 5: Baseline logistic regression and generalized regression Elastic Net on the selected predictors of breast cancer from gene-environment interactions**

| Parameters                                     | Logistic Regression Original model<br>with Validation |        |         |        | Generalized Regression<br>Elastic Net |        |          |                          |          |        |        |
|------------------------------------------------|-------------------------------------------------------|--------|---------|--------|---------------------------------------|--------|----------|--------------------------|----------|--------|--------|
|                                                |                                                       |        |         |        | AICc Validation                       |        |          | Leave-One-Out Validation |          |        |        |
|                                                | $p(X^2)$                                              | MR     | AICc    | AUC    | $p(X^2)$                              | MR     | AICc     | AUC                      | $p(X^2)$ | MR     | AUC    |
| <b>Single Factor</b>                           |                                                       |        |         |        |                                       |        |          |                          |          |        |        |
| Age                                            | <.0001                                                | 0.3500 | 33.4751 | 0.6667 | <.0001                                | 0.2375 | 91.6920  | 0.7625                   | <.0001   | 0.2278 | 0.7728 |
| BMI                                            | 0.3516                                                | 0.6000 | 35.1234 | 0.3333 | 1.0000                                | 0.5000 | 110.9036 | 0.5000                   | 1.0000   | 1.0000 | 0.5000 |
| Alcohol                                        | 0.6050                                                | 0.6000 | 32.9332 | 0.5833 | 1.0000                                | 0.5000 | 110.9036 | 0.5000                   | 0.5684   | 0.4684 | 0.5321 |
| <i>MTR2756</i>                                 | 0.3016                                                | 0.4500 | 33.1921 | 0.5000 | 0.3344                                | 0.4500 | 114.1037 | 0.5500                   | 0.4164   | 0.4557 | 0.5417 |
| <b>Two Factors</b>                             |                                                       |        |         |        |                                       |        |          |                          |          |        |        |
| <b>BMI &amp; Alcohol</b>                       |                                                       |        |         |        |                                       |        |          |                          |          |        |        |
| Intercept                                      | 0.1785                                                | 0.3500 | 38.8539 | 0.6042 | 0.3274                                | 0.3875 | 115.0380 | 0.6247                   | 0.5189   | 0.4177 | 0.5833 |
| BMI                                            | 0.1127                                                |        |         |        | 0.1618                                |        |          |                          | 1.0000   |        |        |
| Alcohol                                        | 0.3414                                                |        |         |        | 0.1659                                |        |          |                          | 1.0000   |        |        |
| BMI*Alcohol                                    | 0.1659                                                |        |         |        | 0.0535                                |        |          |                          | 0.2573   |        |        |
| <b>BMI &amp; MTR</b>                           |                                                       |        |         |        |                                       |        |          |                          |          |        |        |
| Intercept                                      | 1.0000                                                | 0.4500 | 40.1133 | 0.4167 | 0.4241                                | 0.4000 | 115.5629 | 0.6138                   | 0.3487   | 0.4177 | 0.5830 |
| BMI                                            | 0.5432                                                |        |         |        | 0.1659                                |        |          |                          | 1.0000   |        |        |
| <i>MTR2756</i>                                 | 0.4856                                                |        |         |        | 0.3253                                |        |          |                          | 1.0000   |        |        |
| BMI* <i>MTR2756</i>                            | 0.1768                                                |        |         |        | 0.0958                                |        |          |                          | 0.3034   |        |        |
| <b>Age &amp; <i>MTR2756</i></b>                |                                                       |        |         |        |                                       |        |          |                          |          |        |        |
| Intercept                                      | 0.0058                                                | 0.3500 | 35.7660 | 0.6771 | 0.0053                                | 0.2375 | 92.5914  | 0.7875                   | 0.0049   | 0.2278 | 0.8010 |
| Age                                            | <.0001                                                |        |         |        | <.0001                                |        |          |                          | <.0001   |        |        |
| <i>MTR2756</i>                                 | 0.3516                                                |        |         |        | 0.2582                                |        |          |                          | 0.2022   |        |        |
| <b>Three Factors</b>                           |                                                       |        |         |        |                                       |        |          |                          |          |        |        |
| <b>Age, <i>MTR2756</i>, &amp; BMI</b>          |                                                       |        |         |        |                                       |        |          |                          |          |        |        |
| Intercept                                      | 0.0151                                                | 0.3500 | 40.5330 | 0.6146 | 0.1297                                | 0.2375 | 94.1395  | 0.7925                   | 0.0122   | 0.2278 | 0.8010 |
| Age                                            | <.0001                                                |        |         |        | <.0001                                |        |          |                          | <.0001   |        |        |
| <i>MTR2756</i>                                 | 0.3458                                                |        |         |        | 0.2358                                |        |          |                          | 0.5258   |        |        |
| BMI                                            | 0.6194                                                |        |         |        | 0.4683                                |        |          |                          | 1.0000   |        |        |
| <b>Four Factors and Interactions (Table 6)</b> |                                                       |        |         |        |                                       |        |          |                          |          |        |        |
| Intercept                                      | 0.2388                                                | 0.3000 | 50.10   | 0.7656 | 0.1972                                | 0.2375 | 94.79    | 0.8213                   | 0.0027   | 0.2278 | 0.8346 |
| Age                                            | 0.0001                                                |        |         |        | <.0001                                |        |          |                          | <.0001   |        |        |
| BMI*Alcohol                                    | 0.1595                                                |        |         |        | 0.2790                                |        |          |                          | 0.0152   |        |        |
| Alcohol                                        | 0.1675                                                |        |         |        | 0.3814                                |        |          |                          | 0.0461   |        |        |
| BMI* <i>MTR2756</i>                            | 0.2526                                                |        |         |        | 0.1162                                |        |          |                          | 0.0581   |        |        |
| <i>MTR2756</i>                                 | 0.4603                                                |        |         |        | 1.0000                                |        |          |                          | 1.0000   |        |        |
| BMI                                            | 0.9215                                                |        |         |        | 0.8302                                |        |          |                          | 1.0000   |        |        |

Note: MR - Misclassification rate; AICc - Akaike's information criterion with corrections; AUC - Area under the curve.
